# Supplementary material for: Childhood reading problems and cognitive ageing across mid to later life
Source: HighWire-hosted journal article supplement (doi:10.1136/jech-2020-215735), 2021-07-06
Supplement: jech-2020-215735supp001_data_supplement.pdf [file jech-2020-215735supp001_data_supplement.pdf]

## SUPPLEMENTARY MATERIALS

**Supplementary Table 1:** Correlation matrix of key predictors and covariates.

**Supplementary Table 2:** Missing data analysis.

**Supplementary Table 3:** Linear mixed models to test effects of reading problems at age 11 on memory and processing speed trajectories from age 43 to 69 (with childhood cognition as a covariate).

**Supplementary Figure 1:** Path model of reading problems at age 11 on ACE outcomes at age 69.

**Supplementary Table 4:** Path model showing direct effects of reading problems on ACE-III outcomes at age 69 and indirect effects through educational attainment.

**Supplementary Table 5:** Path model to test effects of reading problems at age 11 on ACE-III scores at age 69 (with childhood cognition as a covariate).

**Supplementary Table 6:** Path model showing direct effects of reading problems on ACE-III outcomes at age 69 and indirect effects through educational attainment (with childhood cognition as a covariate).

**Supplementary Table 7:** Path model showing direct effects of continuous reading problems on ACE-III outcomes at age 69 and indirect effects through educational attainment.

**Supplementary Table 1:** Correlation matrix of key predictors and covariates.

|                                         | <b>Reading Problems</b> | <b>Sex</b>      | <b>Education</b> | <b>Childhood socioeconomic position</b> | <b>Adult socioeconomic position</b> | <b>Adult affective symptoms</b> | <b>Childhood cognition</b> |
|-----------------------------------------|-------------------------|-----------------|------------------|-----------------------------------------|-------------------------------------|---------------------------------|----------------------------|
| <b>Reading Problems</b>                 | 1                       | -0.04, $p=.007$ | -0.26, $p<.001$  | 0.18, $p<.001$                          | 0.23, $p<.001$                      | 0.05, $p<.001$                  | -0.41, $p<.001$            |
| <b>Sex</b>                              | -0.04, $p=.007$         | 1               | -0.07, $p<.001$  | 0.01, $p<.64$                           | 0.09, $p<.001$                      | -0.06, $p<.001$                 | 0.03, $p=.08$              |
| <b>Education</b>                        | -0.26, $p<.001$         | -0.07, $p<.001$ | 1                | -0.43, $p<.001$                         | -0.53, $p<.001$                     | -0.18, $p<.001$                 | 0.55, $p<.001$             |
| <b>Childhood socioeconomic position</b> | 0.18, $p<.001$          | 0.01, $p<.64$   | -0.43, $p<.001$  | 1                                       | 0.34, $p<.001$                      | 0.11, $p<.001$                  | -0.39, $p<.001$            |
| <b>Adult socioeconomic position</b>     | 0.23, $p<.001$          | 0.09, $p<.001$  | -0.53, $p<.001$  | 0.34, $p<.001$                          | 1                                   | 0.18, $p<.001$                  | -0.46, $p<.001$            |
| <b>Adult affective symptoms</b>         | 0.05, $p<.001$          | -0.06, $p<.001$ | -0.18, $p<.001$  | 0.11, $p<.001$                          | 0.18, $p<.001$                      | 1                               | -0.14, $p<.001$            |
| <b>Childhood cognition</b>              | -0.41, $p<.001$         | 0.03, $p=.08$   | 0.55, $p<.001$   | -0.39, $p<.001$                         | -0.46, $p<.001$                     | -0.14, $p<.001$                 | 1                          |

**Supplementary Table 2:** Missing data analysis.

|                                  |           | <b>t/X<sup>2</sup></b> | <b>df</b> | <b>p</b> |
|----------------------------------|-----------|------------------------|-----------|----------|
| Verbal memory                    |           |                        |           |          |
|                                  | Age 43    | -9.77                  | 2320.05   | <.001    |
|                                  | Age 53    | -8.87                  | 2338.73   | <.001    |
|                                  | Age 60-64 | -4.40                  | 2148      | <.001    |
|                                  | Age 69    | -4.18                  | 2072      | <.001    |
| Letter search speed              |           |                        |           |          |
|                                  | Age 43    | -0.82                  | 3129      | .41      |
|                                  | Age 53    | -0.70                  | 2930      | .48      |
|                                  | Age 60-64 | -0.48                  | 2180      | .63      |
|                                  | Age 69    | -0.57                  | 2109      | .57      |
| ACE-III Total score              |           |                        |           |          |
|                                  |           | -3.37                  | 1381.53   | .001     |
| Reading problems                 |           |                        |           |          |
|                                  |           | 30.12                  | 1         | <.001    |
| Sex                              |           |                        |           |          |
|                                  |           | 9.94                   | 1         | .002     |
| Childhood cognition              |           |                        |           |          |
|                                  |           | -9.33                  | 1968.95   | <.001    |
| Childhood socioeconomic position |           |                        |           |          |
|                                  |           | 42.87                  | 5         | <.001    |
| Adulthood socioeconomic position |           |                        |           |          |
|                                  |           | 93.91                  | 5         | <.001    |
| Education                        |           |                        |           |          |
|                                  |           | 107.07                 | 2         | <.001    |
| Adult affective symptoms         |           |                        |           |          |
|                                  |           | 1.35                   | 2123      | .18      |

**Supplementary Table 3:** Linear mixed models to test effects of reading problems at age 11 on memory and processing speed trajectories from age 43 to 69 (with childhood cognition as a covariate).

|                              | <b>Verbal memory<br/>(N=1726)</b> | <b>Processing speed<br/>(N=1730)</b> |
|------------------------------|-----------------------------------|--------------------------------------|
| <b>Intercept</b>             |                                   |                                      |
| Reading problems             | -4.28 (1.34), .001*               | -9.28 (18.44), .62                   |
| Sex                          | 1.22 (0.58), .04                  | 41.20 (8.30), <.001                  |
| Education                    | 2.22 (0.43), <.001                | 18.93 (6.18), .002                   |
| Childhood cognition          | 1.80 (0.44), <.001                | -1.68 (6.33), .79                    |
| Childhood SEP**              | 0.31 (0.24), .20                  | 0.65 (3.42), .85                     |
| Adulthood SEP**              | -0.92 (0.27), .001                | -0.34 (3.88), .93                    |
| Adulthood affective symptoms | 0.12 (0.08), .17                  | 1.09 (1.20), .36                     |
| <b>Slope</b>                 |                                   |                                      |
| Reading problems             | 0.03 (0.02), .21                  | 0.33 (0.31), .28                     |
| Sex                          | 0.02 (0.01), .05                  | -0.43 (0.14), .002                   |
| Education                    | -0.01 (0.01), .07                 | -0.20 (0.10), .05                    |
| Childhood cognition          | 0.001 (0.01), .88                 | 0.15 (0.10), .16                     |
| Childhood SEP**              | -0.01 (0.004), .03                | -0.05 (0.06), .39                    |
| Adulthood SEP**              | 0.01 (0.005), .25                 | -0.02 (0.06), .74                    |
| Adulthood affective symptoms | -0.004 (0.001), .007              | -0.03 (0.02), .14                    |

\* b (SE), *p*

\*\* Reverse coded

**Supplementary Figure 1:** Path model of reading problems at age 11 on ACE outcomes at age 69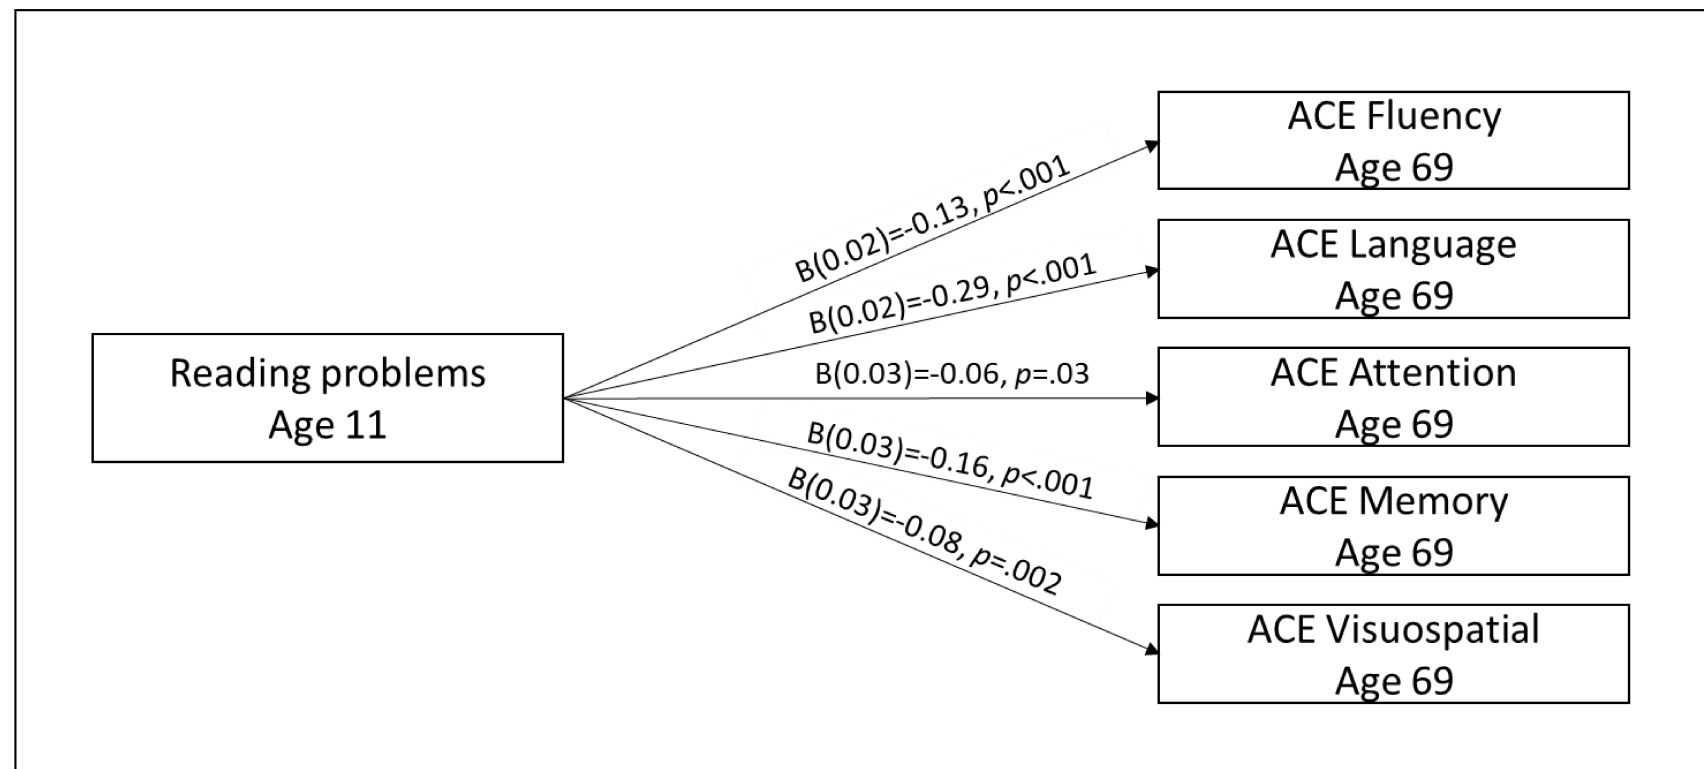

\*Standardised beta presented.

\*All pathways in the model were adjusted for all key covariates.

**Supplementary Table 4:** Path model showing direct effects of reading problems on ACE-III outcomes at age 69 and indirect effects through educational attainment.

|                                        | <b>Fluency</b>       | <b>Language</b>     | <b>Attention</b>  | <b>Memory</b>       | <b>Visuospatial</b> |
|----------------------------------------|----------------------|---------------------|-------------------|---------------------|---------------------|
| Reading prob -> Cognition              | -1.20 (0.21), <.001* | -1.39 (0.12), <.001 | -0.45 (0.20), .03 | -1.98 (0.30), <.001 | -0.44 (0.14), .001  |
| Reading prob -> Education -> Cognition | -0.20 (0.05), <.001  | -0.09 (0.02), <.001 | -0.08 (0.03), .01 | -0.26 (0.06), <.001 | -0.13 (0.03), <.001 |

Model fit statistics: N=1776;  $\chi^2(1)=2.39$ ,  $p=.12$ ; CFI=0.999; TLI=0.970; RMSEA=0.028.

Missing data dealt with using FIML

\* b (SE),  $p$

**Supplementary Table 5:** Path model to test effects of reading problems at age 11 on ACE-III scores at age 69 (with childhood cognition as a covariate).

|                     | <b>Fluency</b>      | <b>Language</b>     | <b>Attention</b>    | <b>Memory</b>       | <b>Visuospatial</b> |
|---------------------|---------------------|---------------------|---------------------|---------------------|---------------------|
| Reading problems    | -0.71 (0.21), .001* | -1.19 (0.12), <.001 | -0.27 (0.21), .19   | -1.48 (0.31), <.001 | -0.21 (0.14), .13   |
| Sex                 | 0.29 (0.10), .003   | 0.05 (0.05), .39    | -0.34 (0.09), <.001 | 0.61 (0.14), <.001  | -0.15 (0.06), .02   |
| Education           | 0.30 (0.07), <.001  | 0.14 (0.04), .001   | 0.13 (0.07), .07    | 0.45 (0.10), <.001  | 0.22 (0.05), <.001  |
| Childhood cognition | 0.63 (0.07), <.001  | 0.27 (0.04), <.001  | 0.23 (0.07), .001   | 0.63 (0.11), <.001  | 0.29 (0.05), <.001  |
| Childhood SEP       | -0.08 (0.04), .03   | -0.03 (0.02), .13   | -0.01 (0.04), .91   | -0.11 (0.06), .06   | -0.05 (0.03), .09   |
| Adulthood SEP       | -0.12 (0.05), .006  | -0.08 (0.03), .001  | -0.08 (0.04), .08   | -0.20 (0.07), .002  | -0.08 (0.03), .007  |
| Affective symptoms  | -0.01 (0.01), .36   | -0.02 (0.01), .03   | -0.01 (0.01), .63   | -0.07 (0.02), <.001 | -0.01 (0.01), .16   |

\* Model fit statistics: N=1699;  $X^2(1)=1.18$ ,  $p=.28$ ; CFI=1.000; TLI=0.995; RMSEA=0.010.

\* b (SE),  $p$

**Supplementary Table 6:** Path model showing direct effects of reading problems on ACE-III outcomes at age 69 and indirect effects through educational attainment (with childhood cognition as a covariate).

|                                        | <b>Fluency</b>      | <b>Language</b>     | <b>Attention</b>  | <b>Memory</b>       | <b>Visuospatial</b> |
|----------------------------------------|---------------------|---------------------|-------------------|---------------------|---------------------|
| Reading prob -> Cognition              | -0.71 (0.21), .001* | -1.20 (0.12), <.001 | -0.26 (0.21), .21 | -1.50 (0.30), <.001 | -0.22 (0.14), .11   |
| Reading prob -> Education -> Cognition | -0.04 (0.02), .08   | -0.02 (0.01), .09   | -0.02 (0.01), .20 | -0.06 (0.03), .08   | -0.03 (0.02), .08   |

\* Model fit statistics: N=1776;  $\chi^2(1)=1.00$ ,  $p=.32$ ; CFI=1.000; TLI=1.000; RMSEA=0.001.

\* b (SE),  $p$



**Supplementary Table 7:** Path model showing direct effects of continuous reading problems on ACE-III outcomes at age 69 and indirect effects through educational attainment.

|                                        | <b>Fluency</b>      | <b>Language</b>     | <b>Attention</b>   | <b>Memory</b>       | <b>Visuospatial</b> |
|----------------------------------------|---------------------|---------------------|--------------------|---------------------|---------------------|
| Reading prob -> Cognition              | 0.06 (0.01), <.001* | 0.05 (0.003), <.001 | 0.02 (0.01), <.001 | 0.09 (0.01), <.001  | 0.03 (0.004), <.001 |
| Reading prob -> Education -> Cognition | 0.01 (0.002), <.001 | 0.003 (0.001), .005 | 0.003 (0.002), .07 | 0.01 (0.003), <.001 | 0.01 (0.001), <.001 |

Model fit statistics: N=1776;  $\chi^2(1)=0.78$ ,  $p=.38$ ; CFI=1.000; TLI=1.004; RMSEA=0.000.

Missing data dealt with using FIML

\* b (SE),  $p$
